# Supplementary material for: A comparative study of the electronic structures of SrCu2O2 and PbCu2O2 by density functional theory, high resolution X-ray photoemission and electron paramagnetic resonance spectroscopy
Source: Royal Society of Chemistry journal article supplement (doi:10.1039/b719364e), 2008-01-01
Supplement: b719364e.pdf [file b719364e.pdf]

### Electronic Supplementary Information File.

#### A comparative study of the electronic structures of $\text{SrCu}_2\text{O}_2$ and $\text{PbCu}_2\text{O}_2$ by density functional theory, high resolution X-ray photoemission and electron paramagnetic resonance spectroscopy.

K. G. Godinho, G.W. Watson, A. Walsh, A.J.H. Green, D.J. Payne, J. Harmer and  
R.G. Egdell

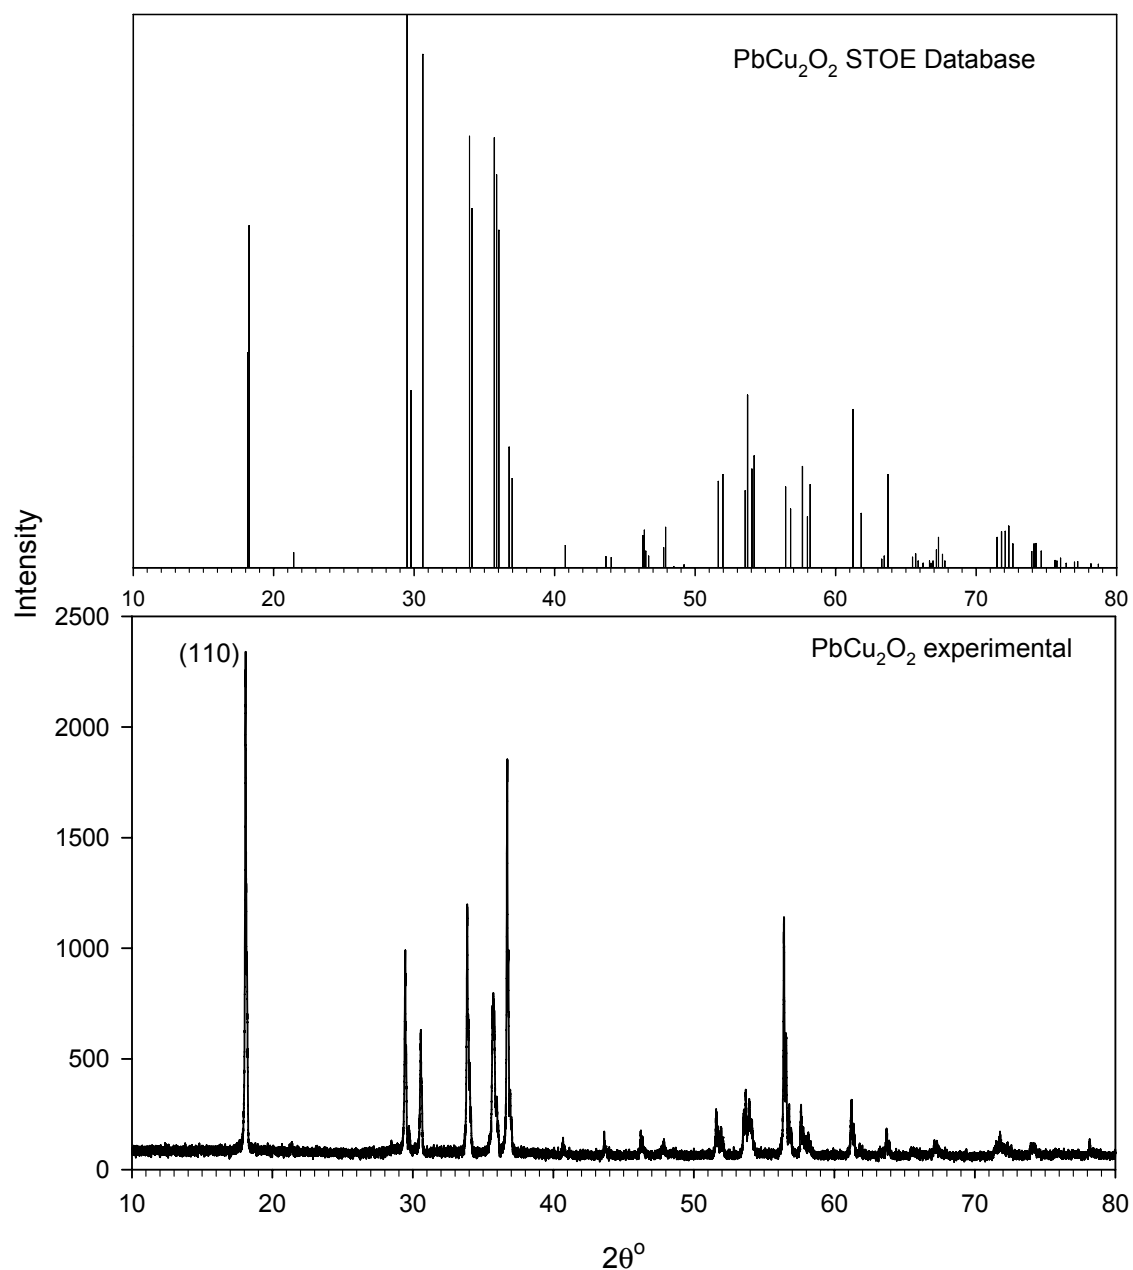

Experimental and reference powder XRD pattern for  $\text{PbCu}_2\text{O}_2$ .

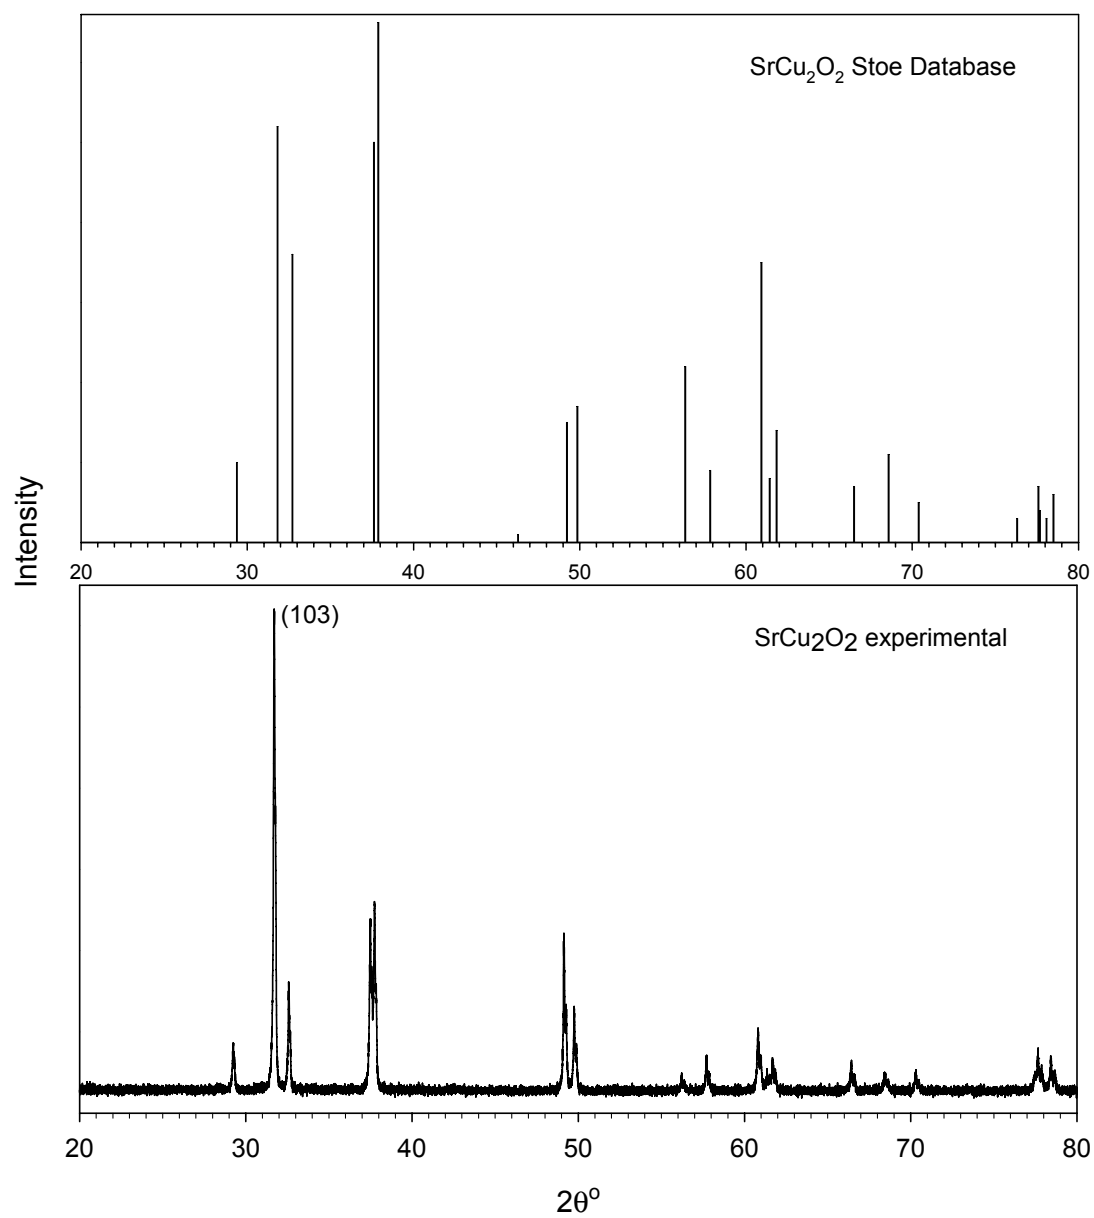

Experimental and reference powder XRD pattern for SrCu<sub>2</sub>O<sub>2</sub>.

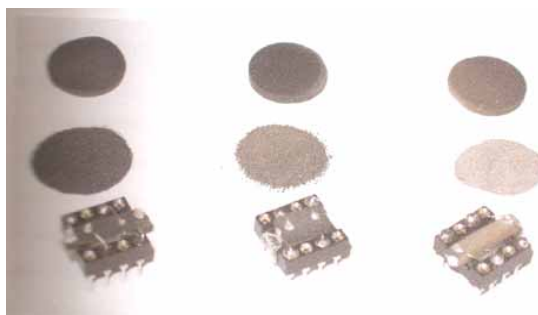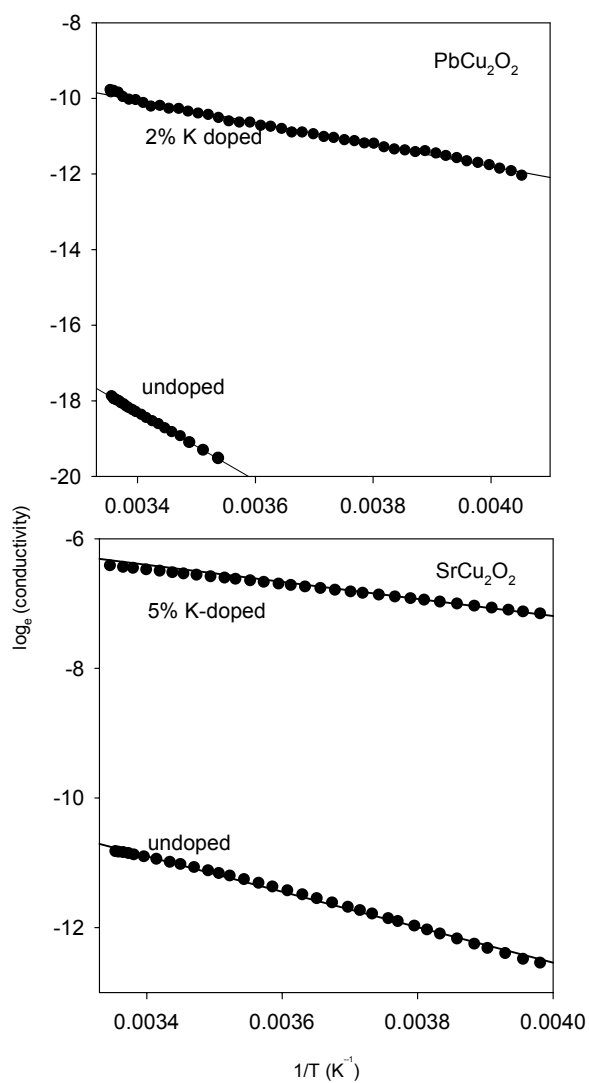

Electronic conductivity data for  $\text{PbCu}_2\text{O}_2$  and  $\text{SrCu}_2\text{O}_2$ . The photograph show samples mounted for the 4 probe measurements.

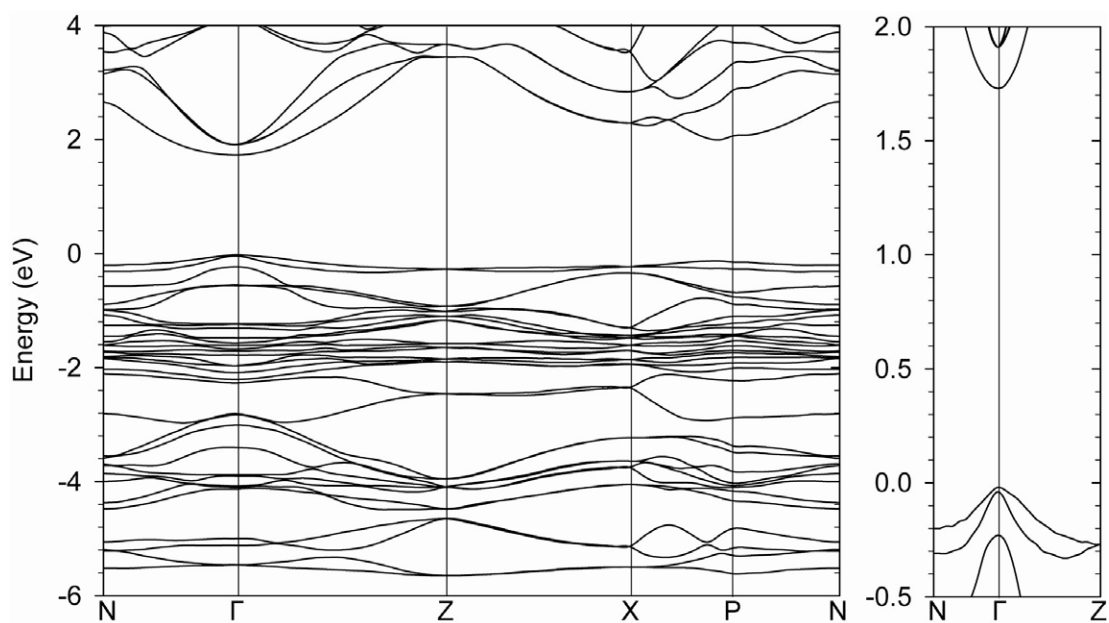

Full electronic bandstructure for SrCu<sub>2</sub>O<sub>2</sub>

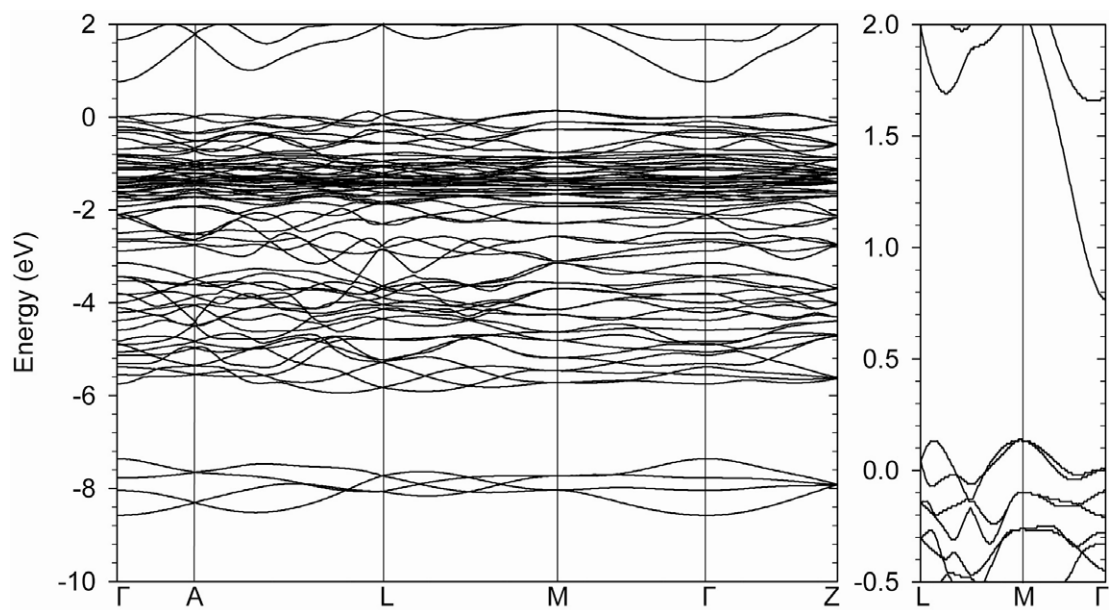

Full electronic bandstructure for PbCu<sub>2</sub>O<sub>2</sub>
